# Supplementary material for: Antibody targeting of a specific region of Pfs47 blocks Plasmodium falciparum malaria transmission
Source: PubMed Central journal article supplement (PMC6039440; doi:10.1038/s41541-018-0065-5), 2018-07-10
Supplement: 41541_2018_65_MOESM1_ESM.pdf [file 41541_2018_65_MOESM1_ESM.pdf]

## Supplementary Information

### **Antibody targeting of a specific region of *Pfs47* blocks *Plasmodium falciparum* malaria transmission**

Gaspar E. Canepa, Alvaro Molina-Cruz, Lampouguin Yenkoidiok Douiti, Eric Calvo, Adeline E. Williams, Marti Burkhardt, Fangni Peng, David Narum, Martin J. Boulanger, Jesus G. Valenzuela, Carolina Barillas-Mury

## A

> *P. falciparum* Pfs47 protein sequence (BV-Pfs47)

```
TQYVCDFFYNPLTNVKPTVVGSSEIYEEVGCTINNPTLGDHIVLICPKKNNGDFSNIIEVPTNCFESHLYSAYKNDSSAYHLEKLDIDKKY  
AINSSSDFYFKILVIPNEYKSHKTIYCRCDNSKTEKNIPGQDKILGKGLGLVKIILRNQYNIIIELEKTKHIIHNKKDITYKYDIKLKESDILMF  
YMKEETIVESGNCEEILNTKINLLSNNNVVIMPSIFINNINCMLSSQDQNNKKNYINLKADKTKHIDGCDFTKPKGKGIYKNGFIINDI  
PNEERICTVHLWNKKNQTIAGIKCPYKLIPPYCFKHVLYEKEIDSQKTYKTFLLSDVLDTPNIEYGNKKEGMYMLALPTKPEKTNKIR  
CICEQGGKKAVMELHIASTSTKYHHHHHH
```

> *P. falciparum* Pfs47 insect codon optimized DNA sequence (BV-Pfs47)

```
ACACAATACGTCTGCGACTTCTACTTCAACCCGCTCACTAACGTCAAGCCAACCGTGGTCGGATCTTCGGAAATCTACGAGGAAGTTGGTTGC  
ACAATCAACAACCCACCCTGGGCGACCACATCGTGCTCATCTGCTCCTAAGAAGAACAACGGTGACTTCTTAACATCGAAATCGTGCCACC  
AAGTCTTCGAGTCTCACCTGTACAGCGCTTACAAGAAGCACTCTCTGCTACCCTGGAGAAGCTGGACATCGATAAGAAGTACGCTATC  
AACAGCTCATTCTCCGACTTCTACCTCAAGATCCTGGTCATCCCCAACGAATACAAGAGCCACAAGACAATCTACTGCCGTTGTGACAACTCAA  
AGACCGAGAAGAACATCCTGGCCAGGATAAGATCCTGAAGGGAAAGCTCGGTTTGGTCAAGATCATCCTCCGCAACCAATACAACAACATC  
ATCGAATTGGAGAAGACTAAGCACATCATCCACAACAAGAAGGACACATACAAGTACGATATCAAGTTGAAGGAATCGGACATCCTGATGTT  
CTACATGAAGGAGGAAACAATCGTTGAGTCAGGAACTGCGAGGAAATCCTCAACACTAAGATCAACCTGCTCTCAAACAACAACGTGGTCA  
TCAAGATGCCTTCGATCTTCATCAACAACATCAACTGCATGTTGTCGTCCCAGGACCAAAAACAACGAGAAGAACTACATCAACCTGAAGGCTG  
ATAAGACCAAGCACATCGACGGATGTGATTTCACTAAGCCAAAGGGCAAGGGCATCTACAAGAACGGTTTCATCATCAACGACATCCCGAAC  
GAGGAAGAGCGTATCTGCACCGTCCACCTCTGGAACAAGAAGAACAGACTATCGCCGGCATCAAGTGCCCATACAAGCTGATCCCCCCTTA  
CTGTTTCAAGCACGTCTCTACGAAAAGGAGATCGACTCCCAAAAGACCTACAAGACTTTCTGCTGTCTGACGTTTTGGATACCCCGAACATC  
GAATACTACGGCAACAACAAGGAGGGGAATGTACATGCTGGCCCTCCCAACTAAGCCGGAGAAGACAACAAGATCCGTTGTATCTGCGAGC  
AAGGTGGAAGAAGGCTGTCATGGAAGTGCACATCGCTTCTACATCTACAAAATATCATCATCATCATCATTGA
```

## B

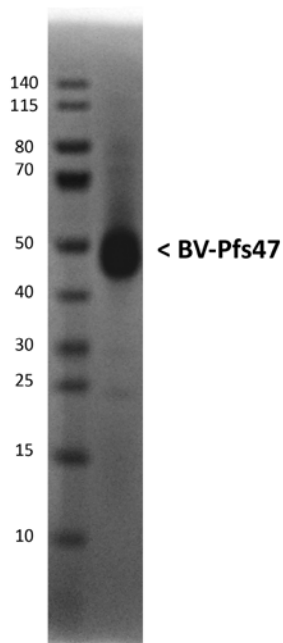

**Supplemental figure 1.** Expression and Purification of BV-Pfs47 using the baculovirus expression system (a) Protein and DNA optimized sequences of BV-Pfs47. His Tag is highlighted in grey. (b) Coomassie blue-stained SDS-PAGE gel illustrating purified BV-Pfs47. The unlabeled lane corresponds to the molecular weight standards (kDa).

## A

> *P. falciparum* Pfs47 Thioredoxin fusion protein sequence (T-Pfs47)

```
MSDKI IHLTDDSFDTDVLKADGAILVDFWAEWCGPKMIAPILDEIADEYQGKLTVAKLNIDQNPGTAPKYGIRGIPTLLLFKNGEVAAT
KVGALSKGQLKEFLDANLAGSGSGHSSGLVPRGSGMKETA AAKFERQHMDSPDLGTD DDDDKAMADISDPNSSSVDKLAAATQYVCDYFYN
PLTNVKPTVVGSSSEIYEEVGGCTINNPTLGDHIVLICPKKNNGDFSNIEIVPTNCFESHLYSAYKNDSSAYHLEKLDIDKKYAINSSFSDF
YLKILVIPNEYKSHKTIYCRCDNSKTEKNIPGQDKILKGLGLVKIILRNQYNNIIELEKTKPIIHNKKDITYKYDIKLLKESDILMFYMK
ETIVESGNCEEIILNTKINLLSNNNVVIKMP SIFINNINCLSSQDQNEKNYINLKADKTKHIDGCDFTKPKGKGIYKNGFIINDIPNEE
ERICTVHLWNKKNQTIAGIKCPYKLIPPYCFKHVLYEKEIDSQKYTKTFLLSVDLDTPNIEEYGNKKEGMYMLALPTKPEKTNKIRCICE
QGGKKAVMELHIASTSTKYHHHHHH
```

> *P. falciparum* Pfs47 Thioredoxin fusion *E. coli* codon optimized DNA sequence (T-Pfs47)

```
ATGAGCGATAAAATTATTCACCTGACTGACGACAGTTTTGACACGGATGTA CTAAGCGGACGGGGCGATCCCTCGTGGATTTCTGGCA
GAGTGGTGC GGTCCTGCAAAATGATCGCCCCGATCTGGATGAAATCGCTGACGAATATCAGGGCAAAC TACCCTGCAAAACTGAAC
ATCGATCAAAAACCTGGCACTGCGCCGAAATATGGCATCCGTGGTATCCCGACTCTGCTGCTGTTCAAAAACGGTGAAGTGGCGGCAACC
AAAGTGGGTGCACTGTCTAAAGGTCAGTTGAAAGAGTTCCTCGACGCTAACCTGGCCGGTCTGGTCTGGCCATTCTTCTGGTCTGGT
CCACGCGGTTCTGGTATGAAAGAAACCGCTGCTGCTAAATTCGAACGCCAGCACA TGGACAGCCAGATCTGGGTACCGACGACGACGAC
AAGGCCATGGCTGATATCTCGGATCCGAATTCGAGCTCCGTCGACAAGCTTGCGGGCCGCAACACAATACGTATGTGATTTTTATTTAAT
CCCCTGACTAATGTTAAGCCAACCTGTAGTTGGGTCATCTGAAATATACGAAGAAGTTGGATGTACTATAAACAACCTACGTTGGGTGAC
CATATAGTATTAATATGTCCTAAGAAAATAATGGAGATTTTAGTAAATATAGAAAATAGTACCTACTAAGTGTGTTTGAATCTCATTATAT
TCTGCTTATAAAAATGATTCAGCGCATATCATTAGAAAATTAGATATCGATAAAAAGTATGCAATAAATTCATCGTTCAGTGATTTT
TATTTAAAAATTTTAGTTATACCTAATGAATATAAAAAGTCATAAACTATATATTTGATAGTGTGATAATAGTAAAAACGGAAAAAATATC
CCAGGACAAGATAAAAATATTAAGGAAAATTAGGATTAGTAAAAATAATTTTAAAGAAACCAATATAATAATATAATAGAATTAGAAAA
ACAAAACCTATTATACATAATAAGGAGGATACATATAAGTATGATATAAAAATTAAGGAAAGTATATACTTATGTTTTATATGAAAGAA
GAACTATTGTAGAATCTGGAAATGTGAAGAAATATTAATACTAAAATAAATCTATTATCAAATAATAATGTGGTTATAAAAATGCCT
TCCATATTTATAAATAATATTAATTGTATGCTTTCATCTCAAGATCAAATAATGAAAAAATTTATATAAATCTAAAAGCTGACAAAAACA
AAACATATAGATGGGTGTGATTTTACGAAAACCTAAAGGTAAGGTATATACAAAAATGGATTCATAAATAAATGATATACCAAATGAAGAA
GAACGTATATGTACTGTTTCATCTTTGGAATAAAAAAATCAAAC TATTGCAGGCATTAATGTCCATATAAATTAATACCACCATATTGT
TTTAAACATGTATTATATGAAAAAGAAATCGATTGCAAAAAGACATATAAAACATTTCTATTAAGTGATGTATTAGATACACCTAATATA
GAATATTTATGAAATAATAAGGAAGGCATGTATATGTTAGCCTTACCAACAAAACAGAAAAACAAATAAATTAGATGTATTTGTGAA
CAAGTGGAAAAAAGCAGTAATGGAATTACATATCGCATCTACATCTACAAAAATACACCACCACCACCACCCTGA
```

## B

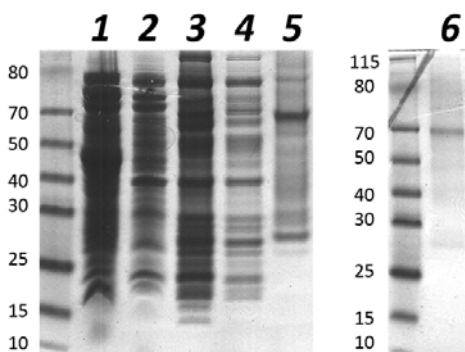

**Supplemental figure 2.** Expression and Purification of T-Pfs47 expressed in *E. coli* Shuffle T7. (a) Protein and DNA optimized sequence of T-Pfs47. Thioredoxin fusion protein from pET32 and His Tag are highlighted in grey. (b) Purification of T-Pfs47 (thioredoxin fusion protein); lane 1 - induced cells total lysate; lane 2 - induced cells soluble fraction; lane 3 - first wash of the inclusion bodies (1% triton solution); lane 4 - second wash of the inclusion bodies; lane 5 - inclusion bodies solubilized with 8M urea; lane 6 - purified soluble protein after in-column refolding and nickel affinity purification. The unlabeled lane corresponds to the molecular weight standards (kDa).

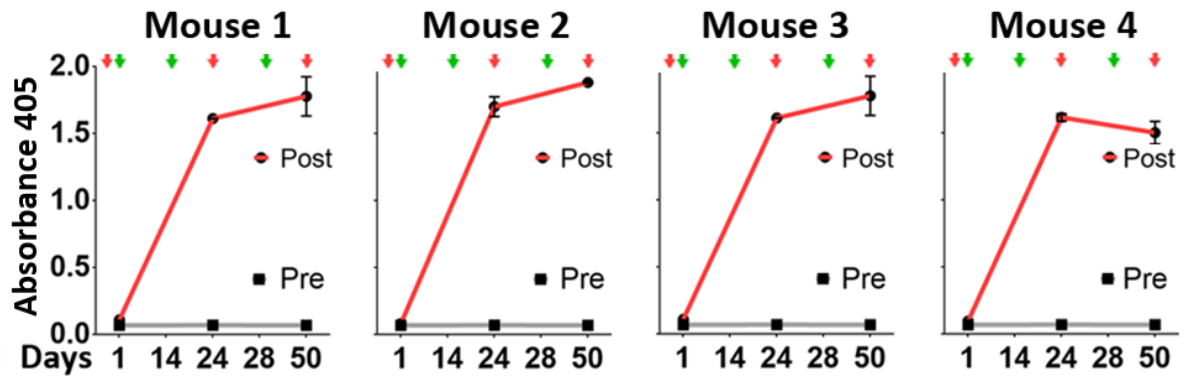

**Supplemental figure 3.** Immunogenicity of T-Pfs47 in mice. Time course of ELISA titer shows Pfs47 antibody responses after immunization with T-Pfs47 prime and boost in BALB/c mice (Post) compared with control immunization alone (Pre); green arrows indicate vaccination times; red arrows indicate serum sampling.

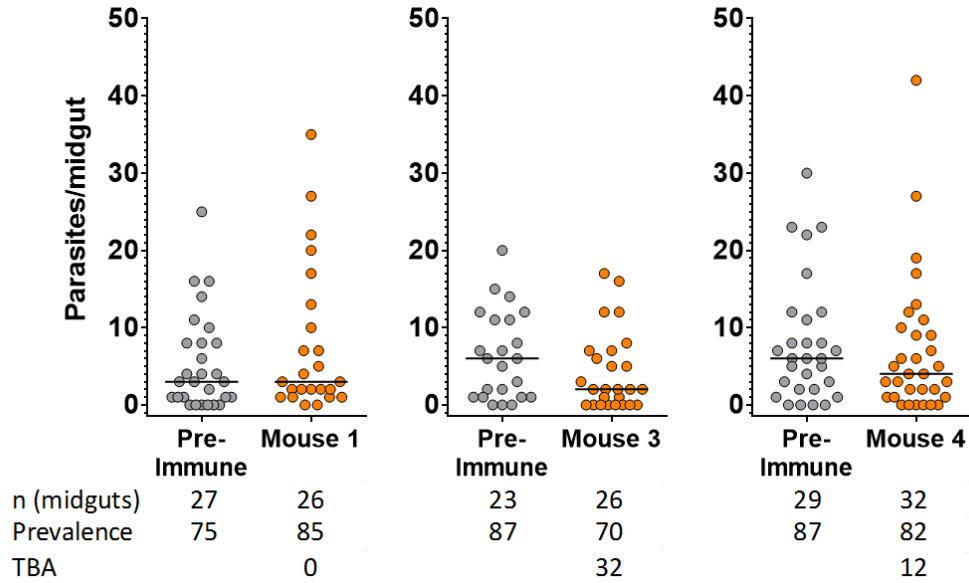

**Supplemental figure 4.** Transmission blocking activity of polyclonal antibodies against T-Pfs47. Submandibular bleeding serum from mouse 1, 3 and mouse 4 at day 50 was used to purify total IgG. 200 µg/ml of IgG was mixed with *P. falciparum* NF54 cultured gametocytes and fed to *A. gambiae* mosquitoes in SMFA. Data points represent the number of oocysts in individual mosquitoes and the lines show the median. The table shows the number of mosquitoes dissected (n), the prevalence and percent inhibition of infection intensity, calculated relative to the mean number of oocysts from control group (Pre-Immune, grey dots). Distribution of parasite numbers in individual mosquitoes between control and experimental groups was compared using the non-parametric Mann Whitney test: no label, no significant difference.

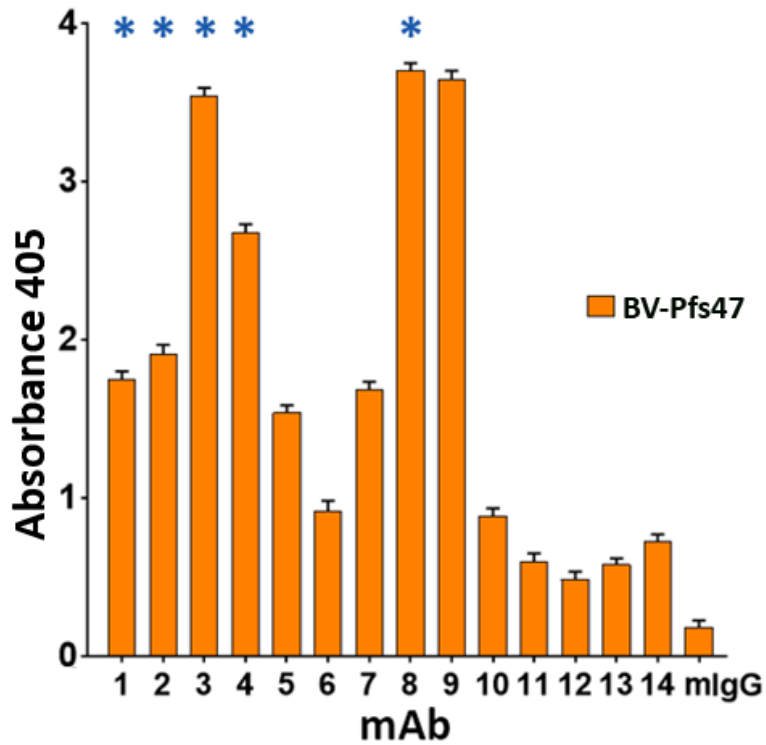

**Supplemental figure 5.** Characterization of monoclonal antibodies generated against T—Pfs47. Reactivity of monoclonal antibodies 1 to 14 (0.1  $\mu\text{g}/\text{ml}$ ) generated against T-Pfs47 versus BV-Pfs47 (1  $\mu\text{g}/\text{ml}$ ) in ELISA. Column and errors bars represent mean OD 405  $\pm$  standard deviation of three replicate assays, mlgG corresponds to mouse purified IgG, blue asterisk denotes positive immunofluorescence monoclonal antibodies.

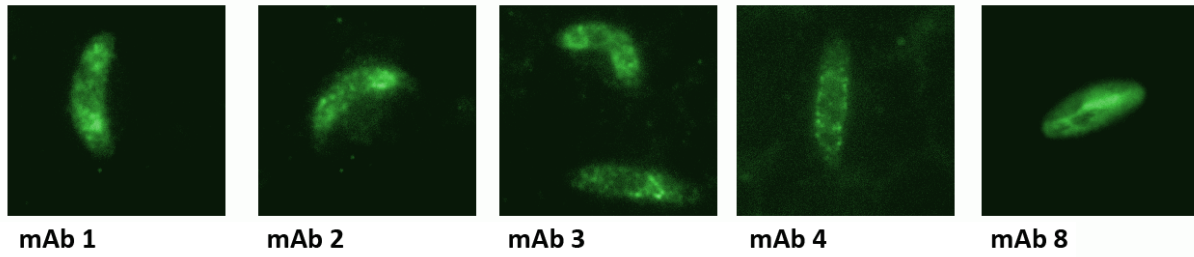

**Supplemental figure 6.** Immunofluorescence assay of *in vitro* cultured *P. falciparum* NF54 gametocytes stained with purified total IgG of mAbs 1, 2, 3, 4 and 8 generated against T-Pfs47 (green).

## A

> *P. falciparum* Pfs47 Domain 1 Thioredoxin fusion protein sequence (**T-Pfs47-D1**)  
MSDKI IHLTDDSFDTDLKADGAILVDFWAEWCGPCKMIAPILDEIADEYQGKLTVAKLNIDQNPGTAPKYGIRGIPTLLLFKNGE  
VAATKVGALSKGQLKEFLDANLAGSGSGHSSGLVPRGSGMKETAALKFERQHMDSPDLGTDDDDKAMADISDPNSSVVDKLAATQ  
YVCDYFYNPLTNVKTVPVGSSEIYEEVVGCTINNPTLGDHIVLICPKKNNGDFSNIIEIVPTNCFESHLYSAYKNDSSAYHLEKLDID  
KKYAINSSFSDFYLKILVIPNEYKSHKTIYCRCDNHHHHHH.

> *P. falciparum* Pfs47 Domain 1 Thioredoxin fusion *E. coli* codon optimized DNA sequence (**T-Pfs47-D1**)  
ATGAGCGATAAAATTATTACACCTGACTGACGACAGTTTTGACACGGATGTACTCAAAGCGGACGGGGCGATCCTCGTCGATTTCTG  
GGCAGAGTGGTGCCTGCCGTGCAAAATGATCGCCCCGATTCTGGATGAAATCGCTGACGAATATCAGGGCAAACGACCGTTGCAA  
AACTGAACATCGATCAAAACCTGGCACTGCGCCGAAATATGGCATCCGTGGTATCCCGACTCTGCTGCTGTTCAAAAACGGTGAA  
GTGGCGGCAACCAAAGTGGGTGCACTGTCTAAAGGTCAGTTGAAAGAGTTCCCTCGACGCTAACCTGGCCGGTTCTGGTTCTGGCCA  
TTCTTCTGGTCTGGTGCCACGCGTCTGGTATGAAAGAAACCGTGTCTGCTAAATTCGAACGCCAGCACATGGACAGCCAGATC  
TGGGTACCGACGACGACGACAAGGCCATGGCTGATATCTCGGATCCGAATTCGAGCTCCGTCGACAAGCTTGCGGCCGCAACACAA  
TACGTATGTGATTTTTATTTAATCCCCTGACTAATGTTAAGCCAACTGTAGTTGGGTCATCTGAAATATACGAAGAAGTTGGATG  
TACTATAAACCAACCTACGTTGGGTGACCATATAGTATTAATATGTCTAAGAAAAATAATGGAGATTTTAGTAATATAGAAAATAG  
TACCTACTAACTGTTTTGAATCTCATTTATATTTCTGCTTATAAAAATGATTCCAGCGCATATCATTTAGAAAAATTAGATATCGAT  
AAAAAGTATGCAATAAATTCATCGTTCAGTGATTTCTATTTAAAAATTTTAGTTATACCTAATGAATATAAAAAGTCATAAACTAT  
ATATTGTAGATGTGATAATCACCACCACCACCACCCTGA

## B

> *P. falciparum* Pfs47 Domain 3 Thioredoxin fusion protein sequence (**T-Pfs47-D3**)  
MSDKI IHLTDDSFDTDLKADGAILVDFWAEWCGPCKMIAPILDEIADEYQGKLTVAKLNIDQNPGTAPKYGIRGIPTLLLFKNGE  
VAATKVGALSKGQLKEFLDANLAGSGSGHSSGLVPRGSGMKETAALKFERQHMDSPDLGTDDDDKAMADISDPNSSVVDKLAANN  
EKNYINLKADKTKHIDGCDFTKPKGKGIYKNGFIINDIPNEEERICVHVLWNKNQTIAGIKCPYKLIPPYCFKHVLYEKEIDSQK  
TYKTFLLSDVLDTPNIEYYGNNEKMGMYMLALPTKPEKTNKIRICICEQGGKAVMELHIASSTSKYHHHHHH.

> *P. falciparum* Pfs47 Domain 3 Thioredoxin fusion *E. coli* codon optimized DNA sequence (**T-Pfs47-D3**)  
ATGAGCGATAAAATTATTACACCTGACTGACGACAGTTTTGACACGGATGTACTCAAAGCGGACGGGGCGATCCTCGTCGATTTCTG  
GGCAGAGTGGTGCCTGCCGTGCAAAATGATCGCCCCGATTCTGGATGAAATCGCTGACGAATATCAGGGCAAACGACCGTTGCAA  
AACTGAACATCGATCAAAACCTGGCACTGCGCCGAAATATGGCATCCGTGGTATCCCGACTCTGCTGCTGTTCAAAAACGGTGAA  
GTGGCGGCAACCAAAGTGGGTGCACTGTCTAAAGGTCAGTTGAAAGAGTTCCCTCGACGCTAACCTGGCCGGTTCTGGTTCTGGCCA  
TTCTTCTGGTCTGGTGCCACGCGTCTGGTATGAAAGAAACCGTGTCTGCTAAATTCGAACGCCAGCACATGGACAGCCAGATC  
TGGGTACCGACGACGACGACAAGGCCATGGCTGATATCTCGGATCCGAATTCGAGCTCCGTCGACAAGCTTGCGGCCGCAATAAT  
GAAAAAATTATATAAATCTAAAAGCTGACAAAACAAAACATATAGATGGGTGTGATTTTACGAAACCTAAAGGTAAGGTATATA  
CAAAAATGGATTTCATAAATGATATACCAATGAAGAAGAAGTATATGACTGTTTCATCTTTGGAATAAAAAAATCAAACTA  
TTGCAGGCATTAATGTCATATAAATTAATACCACCATATGTTTAAACATGTATTATATGAAAAAGAAATCGATTGCAAAAAG  
ACATATAAAACATTTCTATTAAGTGATGTATTAGATACACCTAATATAGAATATTATGAAATAATAAGGAAGGCATGTATATGTT  
AGCCTTACCAACAAAACAGAAAAACAAAATAAATTTAGATGTATTTGTGAACAAGGTGGAATAAAGCAGTAATGGAATTACATA  
TCGCATCTACATCTACAAAATATCACCACCACCACCACCCTGA

## C

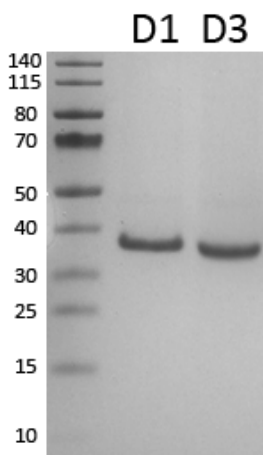

**Supplemental figure 7.** Expression and purification of T-Pfs47-D1 and T-Pfs47-D3. (Protein and DNA optimized sequences of (a) T-Pfs47-D1 and (b) Thioredoxin fusion protein from pET32 and His Tag are highlighted in grey. (c) Coomassie blue-stained SDS-PAGE gel illustrating the purified T-Pfs47-D1 and T-Pfs47-D3. The unlabeled lane corresponds to the molecular weight standards (kDa).



## A

> *P. falciparum* Pfs47 D1-D3 construct (Thr32-Asn154 GSGGSG Asn268-Ala414) protein sequence (**BV-Pfs47-D1-D3**)

TQYVCDFYFNPLTNVKPTVVGSSSEIYEEVGCTINNPTLGDHIVLICPKKNNGDFSNIEIVPTNCFESHLYSAYKNDSSAYHLEKLDIDKKYAINSSFSDFYL  
KILVIPNEYKSHKTIYCRCDNGSGGSGNNEKNYINLKADKTKHIDGCDFTKPKGKGIYKNGFIINDIPNEEERICTVHLWNKKNQTIAGIKCPYKLIPPYC  
FKHVLVEKEIDSQKTYKTFLLSVDLDPNIEYYGNNKEGMYMLALPTKPEKTNKIRCICEQGGKKAVMELHIASTSTKYHHHHHH

> *P. falciparum* Pfs47 D1-D3 construct (Thr32-Asn154 GSGGSG Asn268-Ala414) insect codon optimized DNA sequence (**BV-Pfs47-D1-D3**)

AACAACGAGAAGAAGACTACATCAACCTGAAGGCTGATAAGACCAAGCACATCGACGGATGTGATTTCACTAAGCCAAAGGGCAAGGGCATCT  
ACAAGAACGGTTTCATCATCAACGACATCCCGAACGAGGAAGAGCGTATCTGCACCGTCCACCTCTGGAACAAGAAGAACCAAGACTATCGCC  
GGCATCAAGTGCCCATACAAGCTGATCCCCCTTACTGTTTCAAGCACGTCCTCTACGAAAAGGAGATCGACTCCAAAAGACCTACAAGACT  
TTCTTGCTGTCTGACGTTTTGGATACCCCGAACATCGAATACTACGGCAACAACAAGGAGGGAATGTACATGCTGGCCCTCCCAACTAAGCCG  
GAGAAGACAAACAAGATCCGTTGTATCTGCGAGCAAGGTGAAAGAAGGCTGTCATGGAAGTGCACATCGCTTCTACATCTACAAAATATCA  
TCATCATCATCATCATTGA

## B

**BV-Pfs47 D1-D3**

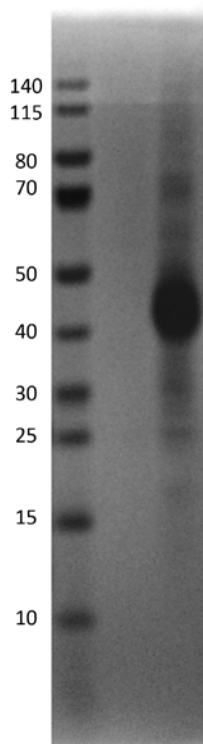

**Supplemental figure 8.** Expression and purification BV-Pfs47 D1-D3. (a) Protein and DNA optimized sequences of BV-Pfs47-D1-D3. His Tag is highlighted in grey. (b) Coomassie blue-stained SDS-PAGE gel illustrating the purified BV-Pfs47-D1-D3. The unlabeled lane corresponds to the molecular weight standards (kDa).

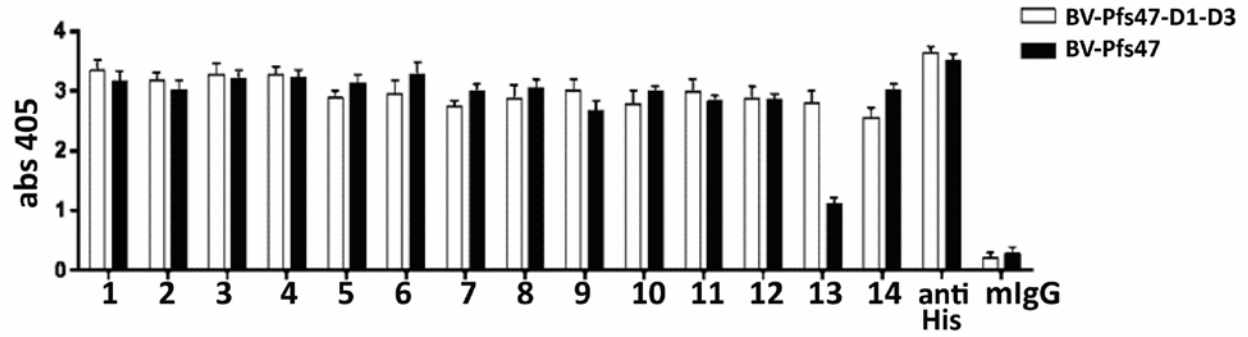

**Supplemental figure 9.** Antigen mapping of monoclonal antibodies generated against T-Pfs47. Reactivity of monoclonal antibodies 1 to 14 (0.1  $\mu\text{g/ml}$ ) generated against T-Pfs47 detecting recombinant BV-Pfs47 (1  $\mu\text{g/ml}$ ) (black bars) or BV-Pfs47-D1-D3 (1  $\mu\text{g/ml}$ ) (white bars) in ELISA. Column and errors bars represent mean OD 405  $\pm$  standard deviation of three replicate assays. mlgG, normal mouse purified IgG.

## A

### *P. falciparum* Pfs47 modified Domain 2 protein sequence (**Pfs47-mD2**)

MSKTEKNIPGQDKILKGLGLVKIILRNQYNNIELEKTKHIIHNKKDITYKYDIKLKESDILMFYMKKETIVESGN<sup>A</sup>EEILNTKINLLSNNNVVIKMPISIFIN  
NIN<sup>A</sup>MLSSQHHHHHH.

### *P. falciparum* Pfs47 modified Domain 2 *E. coli* codon optimized DNA sequence (**Pfs47-mD2**)

ATGAGCAAACCGAGAAAAACATTCCGGGTCAAGATAAAATCCTGAAAGGCAAACCTGGGTCTGGTGAAAATCATCCTGCCTAATCAATACAA  
CAACATCATTGAGCTGGAAAAGACCAAACACATCATTCAACAAGAAGACACCTACAAGTATGATATCAAGCTGAAAGAGAGCGACATTC  
TGATGTTCTATATGAAAGAGGAAACCATCGTGGAAAGCGGTAACG<sup>CGG</sup>AGGAAATCCTGAACACCAAGATTAACCTGCTGAGCAACAACAA  
CGTGGTTATTAATAATGCCGAGCATTTTTATCAACAATATCAAC<sup>CGG</sup>ATGCTGAGCAGCCAACACCACCACCACCACCACTAA

## B

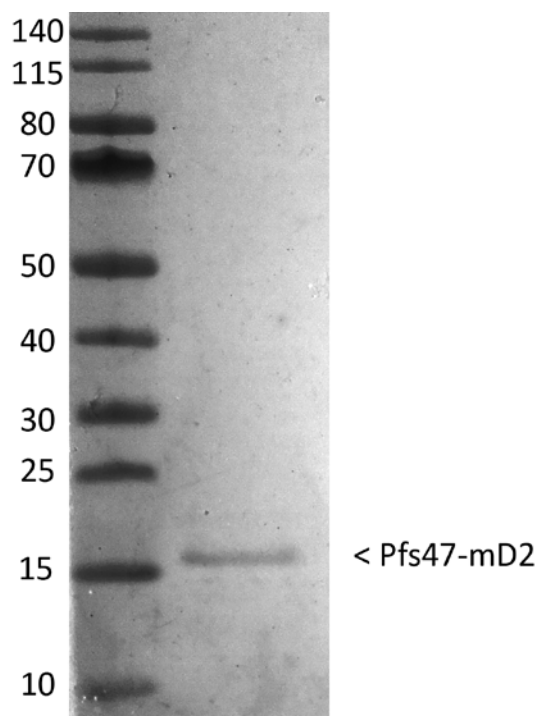

**Supplemental figure 10.** Expression of modified Pfs47 D2 (Pfs47-mD2) in *E. coli*. (a) Protein and DNA optimized sequences of Pfs47-mD2 showing cysteine replacements to alanines in red (C230A, C260A). Six-histidine tag are highlighted in grey. (b) Coomassie blue-stained SDS-PAGE gel illustrating the purified Pfs47-mD2. The unlabeled lanes show molecular weight standards (kDa).

## A

Pfs47-mD2 MSKTEKNIPGQDKILKGKLGVLKIIILRNQYNNIIIELEKTKHIIHNKKDITYKYDIKLKESDILMFYMKEETIVESGNAEEILNTKINLLSNNNVVIKMPISFINNINAMLSSQH<sup>HHHHH</sup>  
 Del1 MILRNQYNNIIIELEKTKHIIHNKKDITYKYDIKLKESDILMFYMKEETIVESGNAEEILNTKINLLSNNNVVIKMPISFINNINAMLSSQH<sup>HHHHH</sup>  
 Del2 MILRNQYNNIIIELEKTKHIIHNKKDITYKYDIKLKESDILMFYMKEETIVESGN<sup>HHHHHH</sup>  
 Del3 MSKTEKNIPGQDKILKGKLGVLKIIILRN<sup>HHHHHH</sup>

## B

*P. falciparum* Pfs47 modified Domain 2 Deletion 1 protein sequence (**Del1**)

MILRNQYNNIIIELEKTKHIIHNKKDITYKYDIKLKESDILMFYMKEETIVESGN<sup>AEEILNTKINLLSNNNVVIKMPISFINNINAMLSSQH<sup>HH</sup></sup>  
 HH.

*P. falciparum* Pfs47 modified Domain 2 Deletion 1 *E. coli* codon optimized DNA sequence (**Del1**)

ATGATCCTCCGCAACCAATACAACAACATCATCGAATTGGAGAAGACTAAGCACATCATCCACAACAAGAAGGACACATACAAGT  
 ACGATATCAAGTTGAAGGAATCGGACATCCTGATGTTCTACATGAAGGAGGAAACAATCGTTGAGTCAGGAAAC<sup>GCC</sup>GAGGAAA  
 TCCTCAACACTAAGATCAACCTGCTCTCAAACAACAACGTGGTCATCAAGATGCCTTCGATCTTCATCAACAACATCAAC<sup>GCC</sup>ATGT  
 TGTCGTCCCAGCACCACCACCACCACTAA

*P. falciparum* Pfs47 modified Domain 2 Deletion 2 protein sequence (**Del2**)

MILRNQYNNIIIELEKTKHIIHNKKDITYKYDIKLKESDILMFYMKEETIVESGN<sup>HHHHHHH</sup>.

*P. falciparum* Pfs47 modified Domain 2 Deletion 2 *E. coli* codon optimized DNA sequence (Del2)

ATGATCCTCCGCAACCAATACAACAACATCATCGAATTGGAGAAGACTAAGCACATCATCCACAACAAGAAGGACACATACAAGT  
 ACGATATCAAGTTGAAGGAATCGGACATCCTGATGTTCTACATGAAGGAGGAAACAATCGTTGAGTCAGGAAACC<sup>ACCACCACCA</sup>  
 CCACCACTAA

*P. falciparum* Pfs47 modified Domain 2 Deletion 3 protein sequence (**Del3**)

MSKTEKNIPGQDKILKGKLGVLKIIILRN<sup>HHHHHHH</sup>.

*P. falciparum* Pfs47 modified Domain 2 Deletion 3 *E. coli* codon optimized DNA sequence (**Del3**)

ATGAGCAAAAACCGAGAAAAACATTCCGGGTCAAGATAAAATCCTGAAAGGCAAACCTGGGTCTGGTGAAAATCATCTCGGTAAT<sup>C</sup>  
 ACCACCACCACCACCACTAA

## C

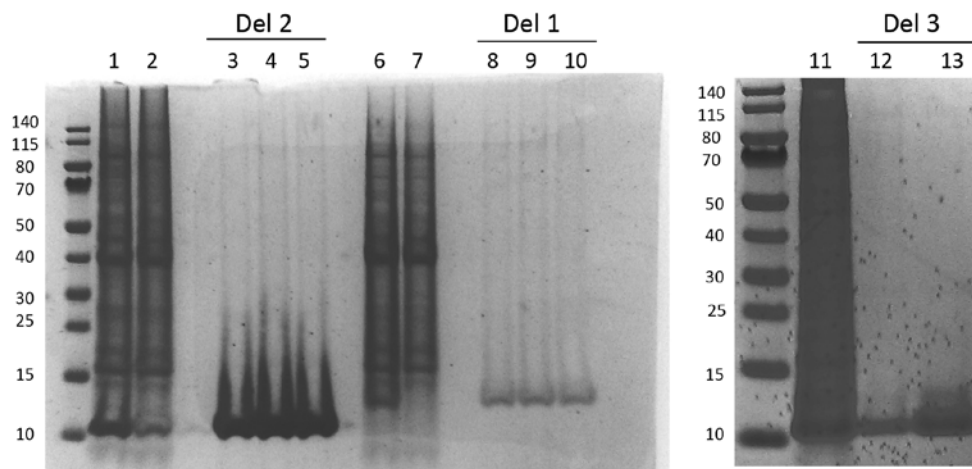

**Supplemental figure 11.** (a) Schematic representation of Pfs47-mD2 and the deletions generated (Del1, Del2, and Del3). (b) Protein and DNA optimized sequences of Del1, Del2, and Del3 showing cysteine replacements to alanines in red (C230A, C260A). Six-histidine tag are highlighted in grey. (c) Coomassie blue-stained SDS-

PAGE gel illustrating the purified Del1, Del2, and Del3. The gel shows the input sample before nickel affinity purification (lane 1, Del2; lane 6, Del1; lane 11, Del3), the flow through after nickel purification (lane 2, Del2; lane 7, Del1) and serial elution from the Nickel affinity purification column (lanes 3, 4 and 5, Del2; lanes 8, 9 and 10, Del1; lanes 12 and 13, Del3). The unlabeled lanes show molecular weight standards.

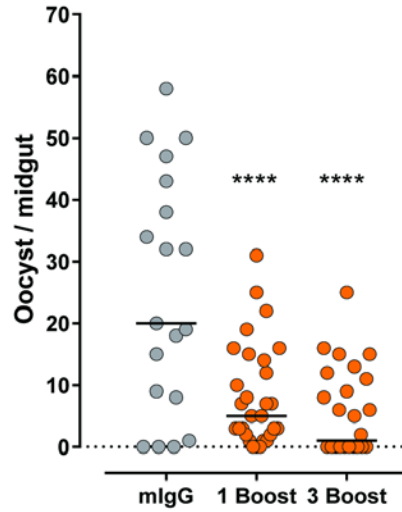

|             |    |    |    |
|-------------|----|----|----|
| n (midguts) | 19 | 29 | 26 |
| Prevalance  | 85 | 90 | 50 |
| TBA         |    | 67 | 78 |

**Supplemental figure 12.** Transmission blocking activity of polyclonal sera against Pfs47-mD2 Del2 (200ug/ml) after 1 or 3 boosts. Data points represent the number of oocysts in individual mosquitoes and the lines show the median. The table shows the number of mosquitoes dissected (n), the prevalence and percent inhibition of infection intensity, calculated relative to the mean number of oocysts from control group (mIgG, grey dots). Medians were compared using the Mann–Whitney test: no label, no significant difference; \*\*\*\*P < 0.0001.

Hp1 ILRNQYNNIIELEKTKHI IHNKKD**TYKYDI**KLKESDILMFY**MKEET**I**VESGN**  
 Hp2 ILRNQYNNIIELEK**TKPI** IHNKKD**TYKYDI**KLKESDILMFY**MKEET**I**VESGN**  
 Hp3 ILRNQYNNIIELEKTKHI IHNKKD**TYKYDI**KLKESDILMFY**I**KEETI**VESGN**  
 Hp4 ILRNQYNNII**D**LEKTKHI IHNKKD**TYKYDI**KLKESDILMFY**MKEET**I**VESGN**  
 Hp5 **V**LRNQYNNIIELEKTKHI IHNKKD**TYKYDI**KLKESDILMFY**MKEET**I**VESGN**  
 Hp6 ILRNQYNNIIELEKTKHI IHNKKD**TYKYDI**KLKESDILMFY**MKEET****N**VESGN  
 Hp7 ILRNQYNN**K**IELEKTKHI IHNKKD**TYKYDI**KLKESDILMFY**MKEET****N**VESGN

**Supplemental figure 13.** Sequence diversity of Pfs47-D2 Del 2 in natural populations of *P. falciparum*. Analysis of the Pfs47 Domain 2-Del2 region from 364 *P. falciparum* isolates from humans collected around the world indicate that there are only seven haplotypes (Hp 1-7) for this 52 aa vaccine target region. Six of them differ by a single amino acid (98% identity), and one by two amino acids (96% identity). Linear B cell epitopes predicted by the Bepipred program are indicated in grey. Amino acid differences are indicated in dark grey and bold.

| Construct            | Fusion                               | System               | Detected Expression (WB, ELISA) |
|----------------------|--------------------------------------|----------------------|---------------------------------|
| pVR2010-Pfs47        | No                                   | Human cells, HEK293i | NO                              |
|                      | Heptamerization Domain               | Human cells, HEK293i | NO                              |
| pBIO-Pfs47 (AVEXIS)  | Cd4 (pentamerization)                | Human cells, HEK293i | NO                              |
| pLAC-Pfs47 (AVEXIS)  | Cd4 (pentamerization) beta-lactamase | Human cells, HEK293i | NO                              |
| pRLNULL-Pfs47        | No                                   | Insect cells, Sua5.1 | NO                              |
|                      |                                      | Insect cells, Aag2   | NO                              |
| BV-Pfs47 Baculovirus | No                                   | Insect cells, SF9    | YES<br>Low yield (~100 µg/L)    |
| pET32-T-Pfs47        | Thioredoxin                          | E. coli, Shuffle T7  | YES<br>Yield ~1 mg/L            |

**Supplemental table 1.** Summary of the plasmid constructs used for optimization of the expression of *Plasmodium falciparum* Pfs47. In all the strategies, the nucleotide sequence of Pfs47 coding region was codon-optimized to suit the expression system used. The predicted signal peptide and GPI anchor were removed, and a histidine tag was added at the C-terminus for affinity purification. Expression of several different Pfs47-encoding constructs in mammalian cell lines (pVR2010, pBIO and pLAC-based plasmids in Human Embryonic Kidney cells) or insect cell lines (Sua5.1 from *Anopheles gambiae* and Aag2 from *Aedes aegypti* cells) were all unsuccessful. The expression in Sf9 insect cells using a Baculovirus expression system resulted in very low yield of the recombinant protein (about 100 µg/L of harvested supernatant). High yields of expression were obtained only when using the pET32 system in *Escherichia coli*, in-column refolding of inclusion bodies followed by affinity purification. WB, western-blot.



| Experiment 1        | mlgG | 4B7 (anti Pfs25) | mAb 1 | mAb 2 | mAb 4 | mAb 5 | mAb 8 |
|---------------------|------|------------------|-------|-------|-------|-------|-------|
| n (midguts)         | 27   | 30               | 30    | 35    | 23    | 21    | 30    |
| Oocyst/mgt Median   | 25   | 2**              | 14.5  | 15    | 33    | 8*    | 35.5  |
| Prevalence (%)      | 93   | 77               | 80    | 89    | 96    | 86    | 90    |
| % Inhibition (mean) |      | 57               | 13    | 21    | 0     | 28    | 0     |

mAb

| Experiment 2        | mlgG | 4B7 (anti Pfs25) | mAb 1 | mAb 2 | mAb 4 | mAb 6 | mAb 7 | mAb 8 |
|---------------------|------|------------------|-------|-------|-------|-------|-------|-------|
| n (midguts)         | 42   | 38               | 36    | 32    | 42    | 21    | 30    | 38    |
| Oocyst/mgt Median   | 1    | 0                | 0     | 25    | 0     | 1     | 1     | 1     |
| Prevalence (%)      | 57   | 16               | 39    | 0     | 36    | 62    | 57    | 58    |
| % Inhibition (mean) |      | 86               | 0     | 54    | 0     | 0     | 0     | 0     |

mAb

| Experiment 3        | mlgG | 4B7 (anti Pfs25) | mAb 1 | mAb 2 | mAb 3 | mAb 4 | mAb 5 |
|---------------------|------|------------------|-------|-------|-------|-------|-------|
| n (midguts)         | 29   | 39               | 34    | 30    | 33    | 26    | 21    |
| Oocyst/mgt Median   | 3    | 0****            | 0**   | 2**   | 1     | 1***  | 0**   |
| Prevalence (%)      | 90   | 10               | 44    | 57    | 70    | 46    | 57    |
| % Inhibition (mean) |      | 98               | 45    | 40    | 19    | 68    | 25    |

mAb

| Experiment 4        | mlgG | 4B7 (anti Pfs25) | mAb 3 | mAb 4 | mAb 5 | mAb 9 | mAb 10 | mAb 13 | mAb 14 |
|---------------------|------|------------------|-------|-------|-------|-------|--------|--------|--------|
| n (midguts)         | 30   | 37               | 31    | 38    | 44    | 51    | 28     | 30     | 30     |
| Oocyst/mgt Median   | 4    | 0                | 2     | 4     | 3     | 4     | 3.5    | 2.5    | 2.5    |
| Prevalence (%)      | 87   | 17               | 75    | 85    | 87    | 87    | 83     | 70     | 70     |
| % Inhibition (mean) |      | 96               | 0     | 20    | 12    | 0     | 5      | 9      | 9      |

mAb

| Experiment 5        | mlgG | 4B7 (anti Pfs25) | mAb 3 | mAb 4 | mAb 8 | mAb 9 | mAb 10 | mAb 11 | mAb 12 |
|---------------------|------|------------------|-------|-------|-------|-------|--------|--------|--------|
| n (midguts)         | 26   | 30               | 30    | 24    | 38    | 26    | 30     | 26     | 30     |
| Oocyst/mgt Median   | 48   | 2                | 28    | 9***  | 20    | 56    | 17     | 16     | 33     |
| Prevalence (%)      | 81   | 24               | 67    | 50    | 56    | 77    | 57     | 58     | 64     |
| % Inhibition (mean) |      | 87               | 10    | 65    | 21    | 5     | 38     | 10     | 0      |

mAb

| Experiment 6        | mlgG | 4B7 (anti Pfs25) | mAb 4 | mAb 5 | mAb 9 | mAb 10 | mAb 11 | mAb 12 | mAb 13 |
|---------------------|------|------------------|-------|-------|-------|--------|--------|--------|--------|
| n (midguts)         | 33   | 30               | 27    | 21    | 37    | 38     | 28     | 32     | 33     |
| Oocyst/mgt Median   | 35   | 2                | 14    | 16    | 12    | 49.5   | 20     | 32.5   | 18     |
| Prevalence (%)      | 88   | 24               | 63    | 53    | 55    | 77     | 65     | 75     | 61     |
| % Inhibition (mean) |      | 87               | 33    | 14    | 38    | 0      | 7      | 0      | 26     |

**Supplemental table 2.** Transmission blocking activity of monoclonal antibodies against T-Pfs47. Purified IgG (200 µg/ml) from mAbs obtained after immunization with T-Pfs47 was mixed with *P. falciparum* NF54 cultured gametocytes and fed to *A. gambiae* mosquitoes in SMFA. The table represent at least six independent SMFA using mAbs 1-14. The table shows the number of mosquitoes dissected (n), the Oocyst/midgut median, the prevalence and percent inhibition of infection intensity, calculated relative to the mean number of oocysts from control group (mlgG,

grey boxes). 4B7 (yellow boxes) correspond to a mAbs against Pfs25 used as control. Orange boxes corresponds to significative TBA. Distribution of parasite numbers in individual mosquitoes between control and experimental groups was compared using the non-parametric Mann Whitney test: no label, no significant difference; \*P < 0.05; \*\*P < 0.01; \*\*\*P < 0.001; \*\*\*\*P < 0.0001.

|                        | Experiment 1 |      | Experiment 2 |      | Experiment 3 |      | Experiment 4 |      |
|------------------------|--------------|------|--------------|------|--------------|------|--------------|------|
|                        | mIgG         | pool | mIgG         | pool | mIgG         | pool | mIgG         | pool |
| n (midguts)            | 40           | 27   | 28           | 38   | 27           | 29   | 27           | 33   |
| Oocyst/mgt<br>Median   | 3            | 1*   | 6            | 1**  | 5            | 3    | 5            | 4    |
| Prevalence (%)         | 68           | 56   | 90           | 64   | 86           | 83   | 85           | 84   |
| % Inhibition<br>(mean) |              | 71   |              | 60   |              | 35   |              | 40   |

**Supplemental table 3.** Transmission blocking activity of pooled monoclonal antibodies against T-Pfs47. Pooled purified IgG (200 µg/ml) from mAbs 2, 3, 4, and 8 was mixed with *P. falciparum* NF54 cultured gametocytes and fed to *A. gambiae* mosquitoes in SMFA. The table represent at least four independent SMFA. The table shows the number of mosquitoes dissected (n), the Oocyst/midgut median, the prevalence and percent inhibition of infection intensity, calculated relative to the mean number of oocysts from control group (mIgG, grey boxes). Orange boxes corresponds to significant TBA. Distribution of parasite numbers in individual mosquitoes between control and experimental groups was compared using the non-parametric Mann Whitney test: no label, no significant difference; \*P < 0.05; \*\*P < 0.01.

| mAb anti Pfs47 mD2  | <i>Plasmodium falciparum</i> NF54 + <i>Anopheles gambiae</i> G3 |              |              |              |                   |
|---------------------|-----------------------------------------------------------------|--------------|--------------|--------------|-------------------|
|                     | Experiment 1                                                    | Experiment 2 | Experiment 3 | Experiment 4 |                   |
| <b>mIgG</b>         |                                                                 |              |              |              | <b>ELISA-WB</b>   |
| n (midguts)         | 35                                                              | 26           | 33           | 24           |                   |
| Oocyst/mgt Median   | 60                                                              | 25           | 2            | 1            |                   |
| Prevalence (%)      | 91                                                              | 81           | 73           | 77           |                   |
| <b>IB2</b>          |                                                                 |              |              |              | <b>IB2</b>        |
| n (midguts)         | 33                                                              | 22           | 43           | 26           | + Elisa Pfs47 mD2 |
| Oocyst/mgt Median   | 14****                                                          | 2****        | 0**          | 0***         | - Elisa BV-Pfs47  |
| Prevalence (%)      | 79                                                              | 46           | 35           | 24           | + WB Pfs47 mD2    |
| % Inhibition (mean) | 70                                                              | 88           | 66           | 84           | + WB BV-Pfs47     |
| <b>BM2</b>          |                                                                 |              |              |              | <b>BM2</b>        |
| n (midguts)         |                                                                 |              | 31           | 26           | + Elisa Pfs47 mD2 |
| Oocyst/mgt Median   |                                                                 |              | 0****        | 0**          | + Elisa BV-Pfs47  |
| Prevalence (%)      |                                                                 |              | 10           | 20           | - WB Pfs47 mD2    |
| % Inhibition (mean) |                                                                 |              | 94           | 74           | + WB BV-Pfs47     |
| <b>AB1</b>          |                                                                 |              |              |              | <b>AB1</b>        |
| n (midguts)         | 33                                                              | 29           |              |              | + Elisa Pfs47 mD2 |
| Oocyst/mgt Median   | 29*                                                             | 2****        |              |              | - Elisa BV-Pfs47  |
| Prevalence (%)      | 97                                                              | 38           |              |              | + WB Pfs47 mD2    |
| % Inhibition (mean) | 37                                                              | 88           |              |              | - WB BV-Pfs47     |
| <b>EB1</b>          |                                                                 |              |              |              | <b>EB1</b>        |
| n (midguts)         | 30                                                              | 32           | 35           |              | + Elisa Pfs47 mD2 |
| Oocyst/mgt Median   | 13****                                                          | 10.5         | 2            |              | - Elisa BV-Pfs47  |
| Prevalence (%)      | 67                                                              | 82           | 73           |              | + WB Pfs47 mD2    |
| % Inhibition (mean) | 67                                                              | 28           | 0            |              | - WB BV-Pfs47     |
| <b>HG3</b>          |                                                                 |              |              |              | <b>HG3</b>        |
| n (midguts)         | 25                                                              | 30           |              |              | + Elisa Pfs47 mD2 |
| Oocyst/mgt Median   | 16****                                                          | 4***         |              |              | - Elisa BV-Pfs47  |
| Prevalence (%)      | 76                                                              | 70           |              |              | + WB Pfs47 mD2    |
| % Inhibition (mean) | 68                                                              | 78           |              |              | + WB BV-Pfs47     |
| <b>BF1</b>          |                                                                 |              |              |              | <b>BF1</b>        |
| n (midguts)         | 36                                                              | 33           |              |              | + Elisa Pfs47 mD2 |
| Oocyst/mgt Median   | 23***                                                           | 0****        |              |              | + Elisa BV-Pfs47  |
| Prevalence (%)      | 77                                                              | 31           |              |              | + WB Pfs47 mD2    |
| % Inhibition (mean) | 51                                                              | 86           |              |              | + WB BV-Pfs47     |
| <b>JH11</b>         |                                                                 |              |              |              | <b>JH11</b>       |
| n (midguts)         |                                                                 |              |              | 28           | + Elisa Pfs47 mD2 |
| Oocyst/mgt Median   |                                                                 |              |              | 4.5*         | + Elisa BV-Pfs47  |
| Prevalence (%)      |                                                                 |              |              | 75           | + WB Pfs47 mD2    |
| % Inhibition (mean) |                                                                 |              |              | -240         | + WB BV-Pfs47     |
| <b>EH3</b>          |                                                                 |              |              |              | <b>EH3</b>        |
| n (midguts)         |                                                                 |              |              | 36           | + Elisa Pfs47 mD2 |
| Oocyst/mgt Median   |                                                                 |              |              | 0            | + Elisa BV-Pfs47  |
| Prevalence (%)      |                                                                 |              |              | 48           | - WB Pfs47 mD2    |
| % Inhibition (mean) |                                                                 |              |              | -22          | + WB BV-Pfs47     |

**Supplemental table 4.** Transmission blocking activity and characterization by ELISA and Western Blot of monoclonal antibodies generated against Pfs47-mD2. Purified IgG (200 µg/ml) from mAbs obtained after immunization with Pfs47-mD2 was mixed with *P. falciparum* NF54 cultured

gametocytes and fed to *A. gambiae* mosquitoes in SMFA. The table represents at least four independent SMFA using mAbs IB2, AB1, HG3, BF1, BM2, EB1, JH11 and EH3. The table shows the number of mosquitoes dissected (n), the Oocyst/midgut median, the prevalence and percent inhibition of infection intensity, calculated relative to the mean number of oocysts from control group (mlgG). Distribution of parasite numbers in individual mosquitoes between control and experimental groups was compared using the non-parametric Mann Whitney test: no label, no significant difference; \*P < 0.05; \*\*P < 0.01; \*\*\*P < 0.001; \*\*\*\*P < 0.0001. The right column represents a summary of the reactivity of these mAbs against the antigens BV-Pfs47 and Pfs47-mD2 on western Blots and ELISA assays.

## **Image Processing.**

All gel images derive from the same experiment and were processed in parallel.
